# Supplementary material
Source: publisher figshare collection journal article supplement (https://acs.figshare.com/ndownloader/files/3946201)
Supplement: Supplementary file 1 [file 3946201]

 
data_p-1 
 
_audit_creation_method            SHELXL-97 
_chemical_name_systematic 
; 
 ? 
; 
_chemical_name_common             ? 
_chemical_melting_point           ? 
_chemical_formula_moiety          ? 
_chemical_formula_sum 
 'C21 H20 Cl6 N W' 
_chemical_formula_weight          682.93 
 
loop_ 
 _atom_type_symbol 
 _atom_type_description 
 _atom_type_scat_dispersion_real 
 _atom_type_scat_dispersion_imag 
 _atom_type_scat_source 
 'C'  'C'   0.0033   0.0016 
 'International Tables Vol C Tables 4.2.6.8 and 6.1.1.4' 
 'H'  'H'   0.0000   0.0000 
 'International Tables Vol C Tables 4.2.6.8 and 6.1.1.4' 
 'Cl'  'Cl'   0.1484   0.1585 
 'International Tables Vol C Tables 4.2.6.8 and 6.1.1.4' 
 'W'  'W'  -0.8490   6.8722 
 'International Tables Vol C Tables 4.2.6.8 and 6.1.1.4' 
 'N'  'N'   0.0061   0.0033 
 'International Tables Vol C Tables 4.2.6.8 and 6.1.1.4' 
 
_symmetry_cell_setting            triclinic 
_symmetry_space_group_name_H-M    'P-1' 
 
loop_ 
 _symmetry_equiv_pos_as_xyz 
 'x, y, z' 
 '-x, -y, -z' 
 
_cell_length_a                    10.288(3) 
_cell_length_b                    10.937(3) 
_cell_length_c                    11.342(3) 
_cell_angle_alpha                 69.140(3) 
_cell_angle_beta                  85.436(3) 
_cell_angle_gamma                 85.915(3) 
_cell_volume                      1187.5(5) 
_cell_formula_units_Z             2 
_cell_measurement_temperature     100(2) 
_cell_measurement_reflns_used     2674 
_cell_measurement_theta_min       2.231
_cell_measurement_theta_max       24.846
 
_exptl_crystal_description        prism 
_exptl_crystal_colour             yellow 
_exptl_crystal_size_max           0.19 
_exptl_crystal_size_mid           0.13 
_exptl_crystal_size_min           0.11 
_exptl_crystal_density_meas       ? 
_exptl_crystal_density_diffrn     1.910 
_exptl_crystal_density_method     'not measured' 
_exptl_crystal_F_000              658 
_exptl_absorpt_coefficient_mu     5.548 
_exptl_absorpt_correction_type    empirical 
_exptl_absorpt_correction_T_min   0.4187 
_exptl_absorpt_correction_T_max   0.5805 
_exptl_absorpt_process_details    
;
 Data were corrected for Lorentz polarization and absorption
 effects (empirical absorption corrections SADABS).
 R(int) = 0.0980 (selected reflections only, before parameter refinement)
 R(int) = 0.0475 (selected reflections only, after parameter refinement)
;
 
_exptl_special_details 
; 
 ? 
; 
 
_diffrn_ambient_temperature       100(2) 
_diffrn_radiation_wavelength      0.71073 
_diffrn_radiation_type            MoK\a 
_diffrn_radiation_source          'fine-focus sealed tube' 
_diffrn_radiation_monochromator   graphite 
_diffrn_measurement_device_type   'CCD area detector' 
_diffrn_measurement_method        'phi and omega scans'
_diffrn_detector_area_resol_mean  ? 
_diffrn_standards_number          ? 
_diffrn_standards_interval_count  ? 
_diffrn_standards_interval_time   ? 
_diffrn_standards_decay_%         ? 
_diffrn_reflns_number             11628 
_diffrn_reflns_av_R_equivalents   0.0526 
_diffrn_reflns_av_unetI/netI     0.0689 
_diffrn_reflns_limit_h_min        -12 
_diffrn_reflns_limit_h_max        12 
_diffrn_reflns_limit_k_min        -13 
_diffrn_reflns_limit_k_max        13 
_diffrn_reflns_limit_l_min        -13 
_diffrn_reflns_limit_l_max        13 
_diffrn_reflns_theta_min          1.92 
_diffrn_reflns_theta_max          25.67 
_reflns_number_total              4478 
_reflns_number_gt                 3384 
_reflns_threshold_expression      >2sigma(I) 
 
_computing_data_collection        'APEX2 (Bruker AXS, 2006)' 
_computing_cell_refinement        'APEX2 (Bruker AXS, 2006)'
_computing_data_reduction         'SAINT (Bruker AXS, 2004)'
_computing_structure_solution     'SHELXS-97 (Sheldrick, 1990)' 
_computing_structure_refinement   'SHELXL-97 (Sheldrick, 1997)' 
_computing_molecular_graphics     'ORTEPII (Jonson, 1996)' 
_computing_publication_material   'XCIF (Bruker AXS, 2001)'
 
_refine_special_details 
; 
 Refinement of F^2^ against ALL reflections.  The weighted R-factor wR and 
 goodness of fit S are based on F^2^, conventional R-factors R are based 
 on F, with F set to zero for negative F^2^. The threshold expression of 
 F^2^ > 2sigma(F^2^) is used only for calculating R-factors(gt) etc. and is 
 not relevant to the choice of reflections for refinement.  R-factors based 
 on F^2^ are statistically about twice as large as those based on F, and R- 
 factors based on ALL data will be even larger. The following restranits
 were applied (given as SHELXL lines):
 dfix 0.95 c8 h8
; 
 
_refine_ls_structure_factor_coef  Fsqd  
_refine_ls_matrix_type            full 
_refine_ls_weighting_scheme       calc  
_refine_ls_weighting_details 
 'calc w=1/[\s^2^(Fo^2^)+(0.0458P)^2^+0.0000P] where P=(Fo^2^+2Fc^2^)/3' 
_atom_sites_solution_primary      direct 
_atom_sites_solution_secondary    difmap 
_atom_sites_solution_hydrogens    geom 
_refine_ls_hydrogen_treatment     mixed 
_refine_ls_extinction_method      none 
_refine_ls_extinction_coef        ? 
_refine_ls_number_reflns          4478 
_refine_ls_number_parameters      265 
_refine_ls_number_restraints      1 
_refine_ls_R_factor_all           0.0678 
_refine_ls_R_factor_gt            0.0406 
_refine_ls_wR_factor_ref          0.0948 
_refine_ls_wR_factor_gt           0.0836 
_refine_ls_goodness_of_fit_ref    1.012 
_refine_ls_restrained_S_all       1.012 
_refine_ls_shift/su_max           0.001 
_refine_ls_shift/su_mean          0.000 
 
loop_ 
 _atom_site_label 
 _atom_site_type_symbol 
 _atom_site_fract_x 
 _atom_site_fract_y 
 _atom_site_fract_z 
 _atom_site_U_iso_or_equiv 
 _atom_site_adp_type 
 _atom_site_occupancy 
 _atom_site_symmetry_multiplicity 
 _atom_site_calc_flag 
 _atom_site_refinement_flags 
 _atom_site_disorder_assembly 
 _atom_site_disorder_group 
C1 C 0.3542(8) 0.6270(7) 0.2693(7) 0.0328(19) Uani 1 1 d . . . 
H1A H 0.2914 0.5601 0.3180 0.039 Uiso 1 1 calc R . . 
H1B H 0.4273 0.5822 0.2361 0.039 Uiso 1 1 calc R . . 
C2 C 0.4061(7) 0.6847(7) 0.3564(7) 0.0274(17) Uani 1 1 d . . . 
C3 C 0.3813(8) 0.6270(7) 0.4854(7) 0.0320(19) Uani 1 1 d . . . 
H3 H 0.3298 0.5521 0.5170 0.038 Uiso 1 1 calc R . . 
C4 C 0.4291(8) 0.6751(8) 0.5695(7) 0.034(2) Uani 1 1 d . . . 
H4 H 0.4125 0.6319 0.6578 0.041 Uiso 1 1 calc R . . 
C5 C 0.5006(8) 0.7854(8) 0.5259(8) 0.038(2) Uani 1 1 d . . . 
H5 H 0.5327 0.8191 0.5839 0.046 Uiso 1 1 calc R . . 
C6 C 0.5261(9) 0.8477(8) 0.3964(8) 0.045(2) Uani 1 1 d . . . 
H6 H 0.5741 0.9250 0.3656 0.054 Uiso 1 1 calc R . . 
C7 C 0.4807(8) 0.7958(8) 0.3122(7) 0.037(2) Uani 1 1 d . . . 
H7 H 0.5006 0.8364 0.2241 0.044 Uiso 1 1 calc R . . 
C8 C 0.3124(8) 0.7218(7) 0.0482(7) 0.0290(18) Uani 1 1 d D . . 
H8 H 0.372(6) 0.656(5) 0.036(7) 0.035 Uiso 1 1 d D . . 
C9 C 0.2576(7) 0.8017(7) -0.0698(7) 0.0248(17) Uani 1 1 d . . . 
C10 C 0.2292(7) 0.7342(7) -0.1481(8) 0.0320(19) Uani 1 1 d . . . 
H10 H 0.2473 0.6423 -0.1218 0.038 Uiso 1 1 calc R . . 
C11 C 0.1753(8) 0.7987(8) -0.2628(8) 0.040(2) Uani 1 1 d . . . 
H11 H 0.1526 0.7512 -0.3132 0.047 Uiso 1 1 calc R . . 
C12 C 0.1546(8) 0.9338(8) -0.3036(8) 0.037(2) Uani 1 1 d . . . 
H12 H 0.1192 0.9797 -0.3831 0.045 Uiso 1 1 calc R . . 
C13 C 0.1857(8) 1.0013(7) -0.2277(7) 0.0327(19) Uani 1 1 d . . . 
H13 H 0.1711 1.0937 -0.2560 0.039 Uiso 1 1 calc R . . 
C14 C 0.2372(7) 0.9379(7) -0.1130(6) 0.0249(17) Uani 1 1 d . . . 
H14 H 0.2590 0.9861 -0.0628 0.030 Uiso 1 1 calc R . . 
C15 C 0.1910(7) 0.8211(7) 0.1884(7) 0.0300(18) Uani 1 1 d . . . 
H15A H 0.1445 0.8716 0.1116 0.036 Uiso 1 1 calc R . . 
H15B H 0.2382 0.8837 0.2125 0.036 Uiso 1 1 calc R . . 
C16 C 0.0937(7) 0.7560(7) 0.2927(7) 0.0252(17) Uani 1 1 d . . . 
C17 C 0.0047(8) 0.6720(7) 0.2790(7) 0.0325(19) Uani 1 1 d . . . 
H17 H 0.0124 0.6492 0.2053 0.039 Uiso 1 1 calc R . . 
C18 C -0.0932(8) 0.6218(8) 0.3685(8) 0.036(2) Uani 1 1 d . . . 
H18 H -0.1506 0.5628 0.3577 0.043 Uiso 1 1 calc R . . 
C19 C -0.1089(8) 0.6567(8) 0.4748(8) 0.037(2) Uani 1 1 d . . . 
H19 H -0.1798 0.6253 0.5348 0.045 Uiso 1 1 calc R . . 
C20 C -0.0211(8) 0.7374(7) 0.4938(7) 0.0313(18) Uani 1 1 d . . . 
H20 H -0.0296 0.7589 0.5682 0.038 Uiso 1 1 calc R . . 
C21 C 0.0793(8) 0.7866(7) 0.4031(7) 0.0298(18) Uani 1 1 d . . . 
H21 H 0.1393 0.8421 0.4162 0.036 Uiso 1 1 calc R . . 
Cl1 Cl 0.90629(18) 0.83608(18) 0.95927(18) 0.0304(4) Uani 1 1 d . . . 
Cl2 Cl 0.8848(2) 0.57974(18) 0.87201(19) 0.0354(5) Uani 1 1 d . . . 
Cl3 Cl 0.7059(2) 0.60789(18) 1.12147(17) 0.0327(5) Uani 1 1 d . . . 
Cl4 Cl 0.56988(18) 0.63365(17) 0.86063(18) 0.0290(4) Uani 1 1 d . . . 
Cl5 Cl 0.76520(19) 0.87287(18) 0.69814(17) 0.0317(4) Uani 1 1 d . . . 
Cl6 Cl 0.58552(18) 0.89007(17) 0.94274(18) 0.0283(4) Uani 1 1 d . . . 
N1 N 0.2870(6) 0.7268(6) 0.1590(6) 0.0273(14) Uani 1 1 d . . . 
W1 W 0.73977(3) 0.73684(3) 0.90791(3) 0.02383(11) Uani 1 1 d . . . 
 
loop_ 
 _atom_site_aniso_label 
 _atom_site_aniso_U_11 
 _atom_site_aniso_U_22 
 _atom_site_aniso_U_33 
 _atom_site_aniso_U_23 
 _atom_site_aniso_U_13 
 _atom_site_aniso_U_12 
C1 0.043(5) 0.026(4) 0.026(4) -0.006(3) -0.013(4) 0.013(4) 
C2 0.027(4) 0.032(4) 0.022(4) -0.008(3) -0.006(3) 0.007(3) 
C3 0.037(5) 0.027(4) 0.032(5) -0.009(4) -0.003(4) -0.003(4) 
C4 0.031(5) 0.055(5) 0.019(4) -0.015(4) -0.001(3) -0.001(4) 
C5 0.041(5) 0.043(5) 0.036(5) -0.017(4) -0.010(4) -0.006(4) 
C6 0.049(6) 0.040(5) 0.046(6) -0.012(4) -0.015(5) -0.012(4) 
C7 0.037(5) 0.047(5) 0.020(4) -0.004(4) 0.000(4) -0.008(4) 
C8 0.032(5) 0.031(4) 0.025(4) -0.011(4) -0.008(4) 0.010(4) 
C9 0.024(4) 0.023(4) 0.029(4) -0.013(3) 0.001(3) 0.006(3) 
C10 0.032(5) 0.021(4) 0.045(5) -0.014(4) -0.008(4) 0.003(3) 
C11 0.039(5) 0.049(5) 0.047(5) -0.036(5) -0.014(4) 0.008(4) 
C12 0.034(5) 0.047(5) 0.031(5) -0.017(4) -0.011(4) 0.018(4) 
C13 0.036(5) 0.026(4) 0.031(5) -0.006(4) -0.001(4) 0.009(4) 
C14 0.031(4) 0.028(4) 0.018(4) -0.011(3) 0.000(3) 0.000(3) 
C15 0.036(5) 0.028(4) 0.025(4) -0.011(3) -0.007(4) 0.014(4) 
C16 0.035(5) 0.017(4) 0.025(4) -0.011(3) -0.005(3) 0.010(3) 
C17 0.045(5) 0.025(4) 0.028(4) -0.010(3) -0.009(4) 0.003(4) 
C18 0.038(5) 0.029(4) 0.037(5) -0.004(4) -0.013(4) -0.003(4) 
C19 0.032(5) 0.036(5) 0.035(5) -0.003(4) -0.002(4) 0.000(4) 
C20 0.033(5) 0.035(4) 0.022(4) -0.005(4) -0.007(4) 0.006(4) 
C21 0.036(5) 0.026(4) 0.030(4) -0.014(4) -0.009(4) 0.009(4) 
Cl1 0.0282(11) 0.0285(10) 0.0385(11) -0.0154(9) -0.0076(9) -0.0009(8) 
Cl2 0.0374(12) 0.0285(10) 0.0442(12) -0.0191(9) -0.0028(10) 0.0079(9) 
Cl3 0.0477(13) 0.0254(10) 0.0253(10) -0.0086(8) -0.0068(9) -0.0012(9) 
Cl4 0.0319(11) 0.0285(10) 0.0341(11) -0.0194(9) -0.0049(9) -0.0033(8) 
Cl5 0.0393(12) 0.0282(10) 0.0277(10) -0.0102(8) -0.0007(9) -0.0017(9) 
Cl6 0.0288(10) 0.0249(9) 0.0388(11) -0.0206(9) -0.0052(9) 0.0036(8) 
N1 0.034(4) 0.028(3) 0.022(3) -0.011(3) -0.009(3) 0.007(3) 
W1 0.03050(19) 0.01840(16) 0.02661(18) -0.01295(12) -0.00475(12) 0.00281(12) 
 
_geom_special_details 
; 
 All esds (except the esd in the dihedral angle between two l.s. planes) 
 are estimated using the full covariance matrix.  The cell esds are taken 
 into account individually in the estimation of esds in distances, angles 
 and torsion angles; correlations between esds in cell parameters are only 
 used when they are defined by crystal symmetry.  An approximate (isotropic) 
 treatment of cell esds is used for estimating esds involving l.s. planes. 
; 
 
loop_ 
 _geom_bond_atom_site_label_1 
 _geom_bond_atom_site_label_2 
 _geom_bond_distance 
 _geom_bond_site_symmetry_2 
 _geom_bond_publ_flag 
C1 C2 1.496(10) . ? 
C1 N1 1.513(9) . ? 
C1 H1A 0.9900 . ? 
C1 H1B 0.9900 . ? 
C2 C3 1.382(10) . ? 
C2 C7 1.398(11) . ? 
C3 C4 1.377(11) . ? 
C3 H3 0.9500 . ? 
C4 C5 1.373(11) . ? 
C4 H4 0.9500 . ? 
C5 C6 1.393(11) . ? 
C5 H5 0.9500 . ? 
C6 C7 1.395(11) . ? 
C6 H6 0.9500 . ? 
C7 H7 0.9500 . ? 
C8 N1 1.283(9) . ? 
C8 C9 1.445(10) . ? 
C8 H8 0.96(2) . ? 
C9 C14 1.398(10) . ? 
C9 C10 1.400(10) . ? 
C10 C11 1.379(11) . ? 
C10 H10 0.9500 . ? 
C11 C12 1.388(11) . ? 
C11 H11 0.9500 . ? 
C12 C13 1.385(11) . ? 
C12 H12 0.9500 . ? 
C13 C14 1.367(10) . ? 
C13 H13 0.9500 . ? 
C14 H14 0.9500 . ? 
C15 N1 1.482(9) . ? 
C15 C16 1.491(10) . ? 
C15 H15A 0.9900 . ? 
C15 H15B 0.9900 . ? 
C16 C17 1.396(10) . ? 
C16 C21 1.402(10) . ? 
C17 C18 1.365(11) . ? 
C17 H17 0.9500 . ? 
C18 C19 1.383(11) . ? 
C18 H18 0.9500 . ? 
C19 C20 1.386(11) . ? 
C19 H19 0.9500 . ? 
C20 C21 1.390(10) . ? 
C20 H20 0.9500 . ? 
C21 H21 0.9500 . ? 
Cl1 W1 2.3078(19) . ? 
Cl2 W1 2.3199(19) . ? 
Cl3 W1 2.3410(19) . ? 
Cl4 W1 2.3404(19) . ? 
Cl5 W1 2.3191(19) . ? 
Cl6 W1 2.3399(18) . ? 
 
loop_ 
 _geom_angle_atom_site_label_1 
 _geom_angle_atom_site_label_2 
 _geom_angle_atom_site_label_3 
 _geom_angle 
 _geom_angle_site_symmetry_1 
 _geom_angle_site_symmetry_3 
 _geom_angle_publ_flag 
C2 C1 N1 113.7(6) . . ? 
C2 C1 H1A 108.8 . . ? 
N1 C1 H1A 108.8 . . ? 
C2 C1 H1B 108.8 . . ? 
N1 C1 H1B 108.8 . . ? 
H1A C1 H1B 107.7 . . ? 
C3 C2 C7 118.0(7) . . ? 
C3 C2 C1 119.7(7) . . ? 
C7 C2 C1 122.3(7) . . ? 
C4 C3 C2 121.8(7) . . ? 
C4 C3 H3 119.1 . . ? 
C2 C3 H3 119.1 . . ? 
C5 C4 C3 120.1(7) . . ? 
C5 C4 H4 119.9 . . ? 
C3 C4 H4 119.9 . . ? 
C4 C5 C6 119.9(8) . . ? 
C4 C5 H5 120.1 . . ? 
C6 C5 H5 120.1 . . ? 
C5 C6 C7 119.6(8) . . ? 
C5 C6 H6 120.2 . . ? 
C7 C6 H6 120.2 . . ? 
C6 C7 C2 120.6(7) . . ? 
C6 C7 H7 119.7 . . ? 
C2 C7 H7 119.7 . . ? 
N1 C8 C9 129.1(7) . . ? 
N1 C8 H8 121(5) . . ? 
C9 C8 H8 110(4) . . ? 
C14 C9 C10 118.7(7) . . ? 
C14 C9 C8 125.9(7) . . ? 
C10 C9 C8 115.4(7) . . ? 
C11 C10 C9 121.2(7) . . ? 
C11 C10 H10 119.4 . . ? 
C9 C10 H10 119.4 . . ? 
C10 C11 C12 119.2(7) . . ? 
C10 C11 H11 120.4 . . ? 
C12 C11 H11 120.4 . . ? 
C13 C12 C11 119.7(8) . . ? 
C13 C12 H12 120.2 . . ? 
C11 C12 H12 120.2 . . ? 
C14 C13 C12 121.5(7) . . ? 
C14 C13 H13 119.3 . . ? 
C12 C13 H13 119.3 . . ? 
C13 C14 C9 119.7(7) . . ? 
C13 C14 H14 120.2 . . ? 
C9 C14 H14 120.2 . . ? 
N1 C15 C16 112.8(6) . . ? 
N1 C15 H15A 109.0 . . ? 
C16 C15 H15A 109.0 . . ? 
N1 C15 H15B 109.0 . . ? 
C16 C15 H15B 109.0 . . ? 
H15A C15 H15B 107.8 . . ? 
C17 C16 C21 117.3(7) . . ? 
C17 C16 C15 121.2(7) . . ? 
C21 C16 C15 121.2(7) . . ? 
C18 C17 C16 121.9(7) . . ? 
C18 C17 H17 119.1 . . ? 
C16 C17 H17 119.1 . . ? 
C17 C18 C19 120.2(8) . . ? 
C17 C18 H18 119.9 . . ? 
C19 C18 H18 119.9 . . ? 
C18 C19 C20 119.9(8) . . ? 
C18 C19 H19 120.0 . . ? 
C20 C19 H19 120.0 . . ? 
C19 C20 C21 119.5(7) . . ? 
C19 C20 H20 120.3 . . ? 
C21 C20 H20 120.3 . . ? 
C20 C21 C16 121.2(7) . . ? 
C20 C21 H21 119.4 . . ? 
C16 C21 H21 119.4 . . ? 
C8 N1 C15 124.4(6) . . ? 
C8 N1 C1 118.7(6) . . ? 
C15 N1 C1 116.9(6) . . ? 
Cl1 W1 Cl5 90.48(7) . . ? 
Cl1 W1 Cl2 91.50(7) . . ? 
Cl5 W1 Cl2 91.30(7) . . ? 
Cl1 W1 Cl6 91.14(7) . . ? 
Cl5 W1 Cl6 88.95(7) . . ? 
Cl2 W1 Cl6 177.35(7) . . ? 
Cl1 W1 Cl4 178.72(7) . . ? 
Cl5 W1 Cl4 90.79(7) . . ? 
Cl2 W1 Cl4 88.65(7) . . ? 
Cl6 W1 Cl4 88.71(7) . . ? 
Cl1 W1 Cl3 89.55(7) . . ? 
Cl5 W1 Cl3 176.93(7) . . ? 
Cl2 W1 Cl3 91.77(7) . . ? 
Cl6 W1 Cl3 87.98(7) . . ? 
Cl4 W1 Cl3 89.18(7) . . ? 
 
loop_ 
 _geom_torsion_atom_site_label_1 
 _geom_torsion_atom_site_label_2 
 _geom_torsion_atom_site_label_3 
 _geom_torsion_atom_site_label_4 
 _geom_torsion 
 _geom_torsion_site_symmetry_1 
 _geom_torsion_site_symmetry_2 
 _geom_torsion_site_symmetry_3 
 _geom_torsion_site_symmetry_4 
 _geom_torsion_publ_flag 
N1 C1 C2 C3 132.3(7) . . . . ? 
N1 C1 C2 C7 -48.2(11) . . . . ? 
C7 C2 C3 C4 -0.8(12) . . . . ? 
C1 C2 C3 C4 178.7(7) . . . . ? 
C2 C3 C4 C5 1.8(13) . . . . ? 
C3 C4 C5 C6 -0.7(13) . . . . ? 
C4 C5 C6 C7 -1.2(13) . . . . ? 
C5 C6 C7 C2 2.2(13) . . . . ? 
C3 C2 C7 C6 -1.2(12) . . . . ? 
C1 C2 C7 C6 179.3(8) . . . . ? 
N1 C8 C9 C14 44.8(13) . . . . ? 
N1 C8 C9 C10 -138.3(9) . . . . ? 
C14 C9 C10 C11 -3.6(12) . . . . ? 
C8 C9 C10 C11 179.3(7) . . . . ? 
C9 C10 C11 C12 3.0(12) . . . . ? 
C10 C11 C12 C13 -1.3(12) . . . . ? 
C11 C12 C13 C14 0.2(12) . . . . ? 
C12 C13 C14 C9 -0.8(12) . . . . ? 
C10 C9 C14 C13 2.4(11) . . . . ? 
C8 C9 C14 C13 179.2(7) . . . . ? 
N1 C15 C16 C17 -64.9(9) . . . . ? 
N1 C15 C16 C21 121.5(7) . . . . ? 
C21 C16 C17 C18 0.4(11) . . . . ? 
C15 C16 C17 C18 -173.5(7) . . . . ? 
C16 C17 C18 C19 1.9(12) . . . . ? 
C17 C18 C19 C20 -3.3(12) . . . . ? 
C18 C19 C20 C21 2.4(11) . . . . ? 
C19 C20 C21 C16 -0.1(11) . . . . ? 
C17 C16 C21 C20 -1.3(11) . . . . ? 
C15 C16 C21 C20 172.6(7) . . . . ? 
C9 C8 N1 C15 -0.1(13) . . . . ? 
C9 C8 N1 C1 177.2(8) . . . . ? 
C16 C15 N1 C8 127.2(8) . . . . ? 
C16 C15 N1 C1 -50.1(9) . . . . ? 
C2 C1 N1 C8 135.1(8) . . . . ? 
C2 C1 N1 C15 -47.4(9) . . . . ? 
 
_diffrn_measured_fraction_theta_max    0.993 
_diffrn_reflns_theta_full              25.67 
_diffrn_measured_fraction_theta_full   0.993 
_refine_diff_density_max    1.369 
_refine_diff_density_min   -1.388 
_refine_diff_density_rms    0.176 
